# Supplementary material for: DNA Fragmentation Simulation Method (FSM) and Fragment Size Matching Improve aCGH Performance of FFPE Tissues
Source: PLoS One. 2012 Jun 15;7(6):e38881. doi: 10.1371/journal.pone.0038881 (PMC3376148; doi:10.1371/journal.pone.0038881)
Supplement: Table S2 — Additional QC metrics data. (XLSX) [file pone.0038881.s006.xlsx]

## Sheet: Table S2
Table S2. Additional QC metrics
Study ID	Description	dLRsd	SignalToNoise Green	SignalToNoise Red	SignalIntensity Green	SignalIntensity Red	BGNoise Green	BGNoise Red	Reproducibility Green	Reproducibility Red
Fig_1B & 2I	225/225 (bp) self-hyb	0.258616	13.3808	18.8198	41.4315	95.8323	3.09634	5.09209	12.1362	12.8839
Fig_1D	525/225 (bp) self-hyb	0.318709	17.8619	40.8537	59.2605	315.126	3.31771	7.71353	12.631	11.025
Fig_1F	140/525 (bp) self-hyb	0.422435	50.7173	9.79414	213.164	47.4868	4.20298	4.84849	10.556	14.0872
Fig_1H	140/225 (bp) self-hyb	0.744179	2.53329	3.69504	8.18686	17.1843	3.23171	4.65064	19.3759	15.7196
Fig_2I	685/685 (bp) self-hyb	0.14732	58.803	38.8267	230.259	173.079	3.91577	4.45773	10.8815	12.2867
Fig_2I	685/685 (bp) self-hyb	0.149637	51.2938	34.8475	260.73	169.783	5.08307	4.87217	11.1893	12.8975
Fig_2I	625/625 (bp) self-hyb	0.151418	50.597	34.6484	170.086	150.048	3.36158	4.33059	9.16343	10.8319
Fig_2I	625/625 (bp) self-hyb	0.15525	52.578	33.4168	202.86	142.411	3.85827	4.26166	12.3642	12.7991
Fig_2H & 2I	525/525 (bp) self-hyb	0.146441	45.1965	33.2858	218.893	149.04	4.84314	4.47758	12.2307	11.9346
Fig_2I	525/525 (bp) self-hyb	0.154046	57.1601	33.0154	191.759	133.595	3.35477	4.04645	10.7256	13.7196
Fig_2I	525/525 (bp) self-hyb	0.156548	42.4849	29.0421	190.244	130.254	4.47792	4.48501	11.2598	12.4991
Fig_2F & 2I	400/400 (bp) self-hyb	0.158017	45.3551	29.4724	199.831	123.923	4.40592	4.20472	10.335	13.232
Fig_2I	400/400 (bp) self-hyb	0.160046	47.3701	30.8583	172.405	122.553	3.63953	3.97147	11.0518	14.1131
Fig_2I	400/400 (bp) self-hyb	0.163063	40.2389	25.7427	133.82	121.186	3.32564	4.70758	10.2122	12.091
Fig_2D & 2I	315/315 (bp) self-hyb	0.175993	32.4211	23.7986	115.752	116.245	3.57027	4.88454	12.0978	13.0045
Fig_2I	315/315 (bp) self-hyb	0.192732	27.4152	17.7908	102.096	89.3825	3.72407	5.02409	13.0749	14.971
Fig_2I	250/250 (bp) self-hyb	0.22	31.606	22.1426	90.2012	94.4598	2.85393	4.26597	10.0381	12.0473
Fig_2B & 2I	250/250 (bp) self-hyb	0.24	22.1962	14.8093	74.9465	69.427	3.37654	4.68808	12.188	14.9496
Fig_2I	225/225 (bp) self-hyb	0.246825	28.7211	30.7146	82.0078	131.716	2.85532	4.28838	12.0056	12.6599
Fig_6A	GBM1/FSM	0.148922	44.5462	36.4564	179.013	185.315	4.01859	5.08319	14.701	14.8899
Fig_6B	GBM1/Standard	0.437494	40.9384	14.8308	135.333	66.6749	3.30577	4.49572	56.1349	54.4967
Fig_6C	GBM1/FSM/15hr ProK	0.234195	41.4377	20.6319	196.504	83.1335	4.74216	4.02937	13.227	15.7936
Fig_6D	GBM2/FSM/2.0ug	0.203792	37.1623	31.9317	207.405	145.921	5.58106	4.56978	12.3711	13.6158
Fig_6E	GBM2/FSM/1.5ug	0.232528	33.9841	28.1153	168.886	113.41	4.96956	4.03375	16.2861	16.4105
Fig_6F	GBM2/FSM/1.0ug	0.273883	25.8375	20.7661	104.343	74.7216	4.03843	3.59825	16.2159	17.8442
Fig_6G	GBM2/FSM/2.0ug/ext hyb	0.161108	39.4988	31.9513	162.56	167.602	4.11557	5.24555	14.5866	14.4041
Fig_6H	GBM2/FSM/2.0ug/FFPE ref	0.21	27.18	32.69	115.1	144.12	4.23	4.41	0.15	0.16
Craig_FSM_001	FFPE/FSM	0.179101	38.4473	27.3357	168.998	167.512	4.39558	6.12795	14.8259	14.9848
Craig_FSM_002	FFPE/FSM	0.176895	39.112	27.3696	174.94	166.656	4.4728	6.0891	13.0575	13.6673
Craig_FSM_003	FFPE/FSM	0.230123	35.8416	23.6171	152.593	137.077	4.25743	5.80415	12.1644	13.0127
Craig_FSM_004	FFPE/FSM	0.232371	38.5956	22.554	170.483	142.141	4.41716	6.30226	15.4926	15.921
Craig_FSM_005	FFPE/FSM	0.184917	37.6329	36.1094	279.147	216.771	7.41763	6.00318	15.0039	16.1347
Craig_FSM_006	FFPE/FSM	0.166654	43.0559	37.6505	264.003	247.513	6.13164	6.57396	15.4318	15.1846
Craig_FSM_007	FFPE/FSM	0.1737	46.7769	36.1687	220.906	189.275	4.72254	5.23312	13.5197	14.881
Craig_FSM_008	FFPE/FSM	0.185364	51.5104	30.7274	222.185	123.559	4.3134	4.02113	13.1117	17.0282
Craig_FSM_009	FFPE/FSM	0.183967	53.7367	31.4824	234.621	125.048	4.36612	3.972	14.2057	23.4498
Craig_FSM_010	FFPE/FSM	0.230925	52.1764	25.942	214.842	95.7553	4.11761	3.69113	13.3927	18.4873
Craig_FSM_011	FFPE/FSM	0.165293	42.4694	28.3069	185.058	155.822	4.35744	5.50473	16.1555	17.0382
Craig_FSM_012	FFPE/FSM	0.179623	56.2067	32.1147	237.158	139.879	4.21939	4.3556	14.8668	18.7195
Craig_FSM_013	FFPE/FSM	0.229362	51.6905	20.5591	233.849	83.3596	4.52402	4.05464	13.9103	18.9198
Craig_FSM_014	FFPE/FSM	0.200572	39.3428	21.4416	148.419	114.928	3.77246	5.36005	16.6889	18.0269
Craig_FSM_015	FFPE/FSM	0.172134	41.9237	29.7792	181.193	160.741	4.32197	5.39776	15.4217	16.0431
Craig_FSM_016	FFPE/FSM	0.18843	40.9927	26.1945	190.782	155.134	4.65405	5.92238	16.5621	17.8872
Craig_FSM_017	FFPE/FSM	0.207226	41.9895	22.4409	204.209	104.397	4.86334	4.65209	12.9096	16.1174
Craig_FSM_018	FFPE/FSM	0.184162	41.1424	25.918	159.552	134.541	3.87804	5.19103	13.9026	15.6629
Craig_FSM_019	FFPE/FSM	0.223551	42.4956	23.6149	213.2	108.191	5.01699	4.58147	14.9845	16.1215
Craig_FSM_020	FFPE/FSM	0.226911	40.8787	18.0124	182.866	106.346	4.47338	5.90405	18.8014	21.7589
Craig_FSM_021	FFPE/FSM	0.189943	38.809	25.0588	178.139	154.362	4.59015	6.16	12.8663	14.645
Craig_FSM_022	FFPE/FSM	0.213167	35.5865	21.4384	171.231	135.082	4.81169	6.30094	18.3547	19.0462
Craig_FSM_023	FFPE/FSM	0.191346	36.8442	29.3784	192.551	152.756	5.22609	5.19961	11.9977	12.7987
Craig_FSM_024	FFPE/FSM	0.292305	41.7262	18.3856	172.751	82.6136	4.14011	4.49338	13.7708	16.1889
Craig_FSM_025	FFPE/FSM	0.216447	48.5672	27.6308	221.358	153.875	4.55777	5.56896	12.9967	14.6238
Craig_FSM_026	FFPE/FSM	0.230888	34.6409	17.2683	175.074	97.3573	5.05397	5.63791	14.104	17.584
Craig_FSM_027	FFPE/FSM	0.199838	36.6589	22.7611	164.502	128.457	4.48737	5.6437	16.2747	17.971
Craig_FSM_028	FFPE/FSM	0.217462	39.4823	19.8811	169.162	119.701	4.2845	6.02083	15.752	17.3879
Craig_FSM_029	FFPE/FSM	0.195695	34.0085	20.7026	162.168	142.794	4.76845	6.8974	15.1773	16.6422
Craig_FSM_030	FFPE/FSM	0.2006	43.9722	28.2847	189.752	153.588	4.31527	5.43007	16.32	17.8048
Craig_FSM_031	FFPE/FSM	0.211732	41.1617	30.8127	220.077	203.463	5.34664	6.60321	15.2509	16.7251
Craig_FSM_032	FFPE/FSM	0.149234	44.4366	36.6709	201.896	206.255	4.54346	5.62449	15.6173	17.327
Craig_FSM_033	FFPE/FSM	0.167206	39.9994	31.7398	168.086	146.333	4.20221	4.61039	15.1743	15.9659
Craig_FSM_034	FFPE/FSM	0.154621	48.8012	41.0021	223.436	214.344	4.57849	5.22763	15.9073	17.3216
Craig_FSM_035	FFPE/FSM	0.272727	41.2563	18.0007	224.546	113.335	5.44271	6.29615	13.2143	15.4528
Craig_FSM_036	FFPE/FSM	0.181958	39.7182	27.1251	190.506	125.981	4.79644	4.64444	14.6265	16.2894
Craig_FSM_037	FFPE/FSM	0.164558	46.3738	31.7025	229.143	148.456	4.94122	4.68279	15.1337	16.4327
Craig_FSM_038	FFPE/FSM	0.196228	49.8625	25.2326	250.702	102.961	5.02787	4.08048	12.3966	17.9016
Craig_FSM_039	FFPE/FSM	0.170607	41.6096	28.7465	151.102	123.632	3.63142	4.30077	13.9677	15.733
Craig_FSM_040	FFPE/FSM	0.213408	45.3895	29.6518	227.547	159.534	5.01321	5.38025	16.5532	16.8347
Craig_FSM_041	FFPE/FSM	0.171335	46.248	30.2754	218.289	160.395	4.71997	5.29786	13.2893	17.2352
Craig_FSM_042	FFPE/FSM	0.170202	51.7272	30.8521	223.212	169.555	4.31518	5.49574	14.3738	17.3195
Craig_FSM_043	FFPE/FSM	0.161705	41.0405	30.4626	175.094	165.409	4.26637	5.4299	15.6047	17.3284
Craig_FSM_044	FFPE/FSM	0.19642	46.6025	31.0543	215.067	163.455	4.61492	5.26353	13.7549	15.7549
Craig_FSM_045	FFPE/FSM	0.240354	50.4401	31.3039	151.639	132.096	3.00632	4.21979	12.3942	13.1148
Craig_FSM_046	FFPE/FSM	0.272293	53.9086	31.0122	159.9	144.08	2.96613	4.64592	14.3934	13.3696
Craig_FSM_047	FFPE/FSM	0.258253	60.1741	36.0943	164.052	143.593	2.72629	3.97827	13.7326	13.183
Craig_FSM_048	FFPE/FSM	0.188873	47.821	36.4447	149.552	161.046	3.12733	4.41892	12.9409	13.5357
Craig_FSM_049	FFPE/FSM	0.224434	38.7649	25.1798	129.403	118.42	3.33815	4.70298	13.4029	13.9472
Craig_FSM_050	FFPE/FSM	0.219458	33.9333	24.4044	124.971	130.178	3.68284	5.3342	14.6668	15.6569
Craig_FSM_051	FFPE/FSM	0.210066	43.8409	32.3939	132.093	132.776	3.01301	4.0988	14.4895	14.0972
Craig_FSM_052	FFPE/FSM	0.226107	36.0644	22.4893	104.763	90.3612	2.90489	4.01796	14.8704	15.7925
Craig_FSM_053	FFPE/FSM	0.202725	47.3436	38.577	138.59	177.273	2.92732	4.5953	14.1156	14.899
Craig_FSM_054	FFPE/FSM	0.252665	35.3012	22.6041	96.7233	83.8665	2.73994	3.71024	16.0625	17.3346
Craig_FSM_055	FFPE/FSM	0.226787	27.9968	28.6588	112.541	167.887	4.01978	5.85813	14.1377	15.4837
Craig_FSM_056	FFPE/FSM	0.263275	26.8367	26.2006	77.3439	118.437	2.88202	4.5204	15.2428	16.4828
Craig_FSM_057	FFPE/FSM	0.235797	33.5364	20.7369	102.952	93.6549	3.06986	4.51633	15.6337	17.7324
Craig_FSM_058	FFPE/FSM	0.198336	45.052	36.6651	142.858	163.387	3.17096	4.4562	10.8976	12.5355
Craig_FSM_059	FFPE/FSM	0.236292	22.3462	19.7435	164.837	100.379	7.37652	5.08415	17.7324	17.5904
Craig_FSM_060	FFPE/FSM	0.202002	28.3644	25.4426	200.81	118.643	7.07966	4.66316	15.3969	14.9908
Craig_FSM_061	FFPE/FSM	0.201395	32.6584	29.2714	211.654	148.926	6.48085	5.08777	18.101	17.9908
Craig_FSM_062	FFPE/FSM	0.174672	38.1803	26.625	145.109	139.588	3.80062	5.24274	14.7457	15.2643
Craig_FSM_063	FFPE/FSM	0.161108	39.4988	31.9513	162.56	167.602	4.11557	5.24555	14.5866	14.4041
Craig_FSM_064	FFPE/FSM	0.147139	43.283	36.7306	170.726	192.708	3.94441	5.24652	14.6443	14.7645
Craig_FSM_065	FFPE/FSM	0.1828	35.0385	33.095	140.073	164.018	3.99769	4.95598	17.133	15.994
Craig_FSM_066	FFPE/FSM	0.158922	44.5462	36.4564	179.013	185.315	4.01859	5.08319	14.701	14.8899
Craig_FSM_067	FFPE/FSM	0.199975	36.505	23.445	152.244	109.082	4.1705	4.65267	14.9728	17.1758
Craig_FSM_068	FFPE/FSM	0.235432	34.5718	26.0044	128.304	117.36	3.71123	4.51309	16.8767	17.1157
Craig_FSM_069	FFPE/FSM	0.154568	44.4911	33.7732	175.556	169.112	3.94587	5.00729	15.5351	15.9045
Craig_FSM_070	FFPE/FSM	0.190411	40.2259	25.4564	179.74	127.125	4.46827	4.99383	15.8454	17.2757
Craig_FSM_071	FFPE/FSM	0.174819	40.852	29.7513	164.88	149.877	4.03603	5.03766	16.0287	17.3676
Craig_FSM_072	FFPE/FSM	0.178679	45.0029	34.9666	173.475	179.149	3.85475	5.12343	16.8358	16.439
Craig_FSM_073	FFPE/FSM	0.224273	38.8534	22.897	150.445	108.421	3.87212	4.73516	14.5999	15.8943
Craig_FSM_074	FFPE/FSM	0.191108	33.7204	30.3052	137.983	157.622	4.09197	5.20115	16.2001	16.575
Craig_FSM_075	FFPE/FSM	0.181995	33.9608	29.0315	136.181	166.101	4.00995	5.7214	16.4088	16.322
Craig_FSM_076	FFPE/FSM	0.181296	34.2673	31.5919	140.948	150.321	4.11319	4.75822	16.8361	15.6788
Craig_FSM_077	FFPE/FSM	0.214626	33.9335	30.9436	122.74	151.659	3.61707	4.90115	15.4039	17.6405
Craig_FSM_078	FFPE/FSM	0.224672	24.309	22.889	130.84	124.317	5.38237	5.4313	15.5114	16.6439
Craig_FSM_079	FFPE/FSM	0.208286	27.4835	30.3377	141.451	198.593	5.14677	6.54607	14.9573	16.7452
Craig_FSM_080	FFPE/FSM	0.175761	30.4346	34.5544	143.632	192.781	4.71937	5.57905	15.578	15.3426
Craig_FSM_081	FFPE/STANDARD	0.783172	2.66183	6.16128	8.5413	29.553	3.20881	4.79657	na	22.9748
Craig_FSM_082	FFPE/STANDARD	0.311681	20.1129	11.4369	61.5431	51.3286	3.05988	4.48797	20.159	22.1731
Craig_FSM_083	FFPE/STANDARD	0.299366	16.0223	13.4812	39.6442	51.9193	2.47432	3.85124	22.4813	24.1675
Craig_FSM_084	FFPE/STANDARD	0.31892	11.7222	13.5163	36.4678	73.2548	3.111	5.41973	21.6219	19.6268
Craig_FSM_085	FFPE/STANDARD	0.477563	8.77351	9.95716	28.9796	80.0692	3.30308	8.04137	57.3477	55.4741
Craig_FSM_086	FFPE/STANDARD	0.281408	13.9767	22.7213	47.4325	131.046	3.39369	5.76753	19.1498	16.1391
Craig_FSM_087	FFPE/STANDARD	0.343422	11.1957	27.6388	34.7626	162.79	3.10499	5.8899	22.4312	20.68
Craig_FSM_088	FFPE/STANDARD	0.398214	14.5864	8.07371	60.9427	90.5919	4.17806	11.2206	23.5229	22.1053
Craig_FSM_089	FFPE/STANDARD	0.462614	6.95521	13.2464	28.8642	119.808	4.15001	9.04454	22.9253	21.7539
Craig_FSM_090	FFPE/STANDARD	0.651096	5.50411	6.43821	19.7973	40.5629	3.59682	6.30034	37.8116	32.3889
Craig_FSM_091	FFPE/STANDARD	0.366024	9.60753	11.3741	30.5728	58.983	3.18217	5.18575	21.8935	20.3153
Craig_FSM_092	FFPE/STANDARD	0.269526	20.6871	18.1424	81.813	84.3329	3.95478	4.64839	19.8883	20.2704
Craig_FSM_093	FFPE/STANDARD	0.351939	20.6803	9.77193	60.38	37.3708	2.91969	3.8243	20.3326	23.7756
Craig_FSM_094	FFPE/STANDARD	0.296262	14.2844	27.4836	41.179	134.963	2.88279	4.91067	19.933	18.8913
Craig_FSM_095	FFPE/STANDARD	0.632966	7.89009	4.48038	23.2169	18.2828	2.94254	4.08064	21.0803	24.7296
Craig_FSM_096	FFPE/STANDARD	0.354187	11.8438	20.213	41.4266	125.756	3.49776	6.22154	21.7516	19.114
Craig_FSM_097	FFPE/STANDARD	0.237304	55.2672	19.4003	208.48	111.46	3.77222	5.74526	15.1671	17.5086
Craig_FSM_098	FFPE/STANDARD	0.266046	54.8358	30.4774	413.702	219.155	7.54438	7.19074	15.6316	19.2556
Craig_FSM_099	FFPE/STANDARD	0.217412	52.3143	20.9868	177.808	94.0375	3.39884	4.4808	16.5985	18.7939
Craig_FSM_100	FFPE/STANDARD	0.203895	55.1841	22.1918	224.518	127.296	4.06853	5.73618	15.7378	18.0926
Craig_FSM_101	FFPE/STANDARD	0.319197	10.8039	19.0616	32.4738	113.916	3.00575	5.97619	19.9545	18.9679
Craig_FSM_102	FFPE/STANDARD	0.365118	9.58981	22.4669	37.3997	151.262	3.89994	6.73265	14.3563	13.5292
Craig_FSM_103	FFPE/STANDARD	0.427494	40.9384	14.8308	135.333	66.6749	3.30577	4.49572	56.1349	54.4967
Craig_FSM_104	FFPE/STANDARD	0.458323	19.141	22.1971	275.651	120.815	14.4011	5.44283	12.3353	12.0227
Craig_FSM_105	FFPE/STANDARD	0.37067	17.9033	25.5097	768.866	196.786	42.9455	7.71416	16.8143	20.4152
Craig_FSM_106	FFPE/STANDARD	0.310533	16.4843	25.1406	62.3556	191.091	3.78273	7.60088	14.5221	9.17644
Craig_FSM_107	FFPE/STANDARD	0.286931	48.0499	37.2949	478.604	227.568	9.96056	6.10186	15.5938	16.7114
Craig_FSM_108	FFPE/STANDARD	0.262097	16.683	29.049	106.926	155.477	6.40926	5.35224	13.6206	13.5697
Craig_FSM_109	FFPE/STANDARD	0.24474	26.7494	34.0822	108.176	225.912	4.04406	6.62845	14.1302	15.3605
Craig_FSM_110	FFPE/STANDARD	0.213614	16.1967	43.9405	117.746	275.642	7.26975	6.27307	13.9443	12.7245
Craig_FSM_111	FFPE/STANDARD	0.32397	21.7622	32.0766	75.6336	210.006	3.47546	6.54701	15.9301	15.5349
Craig_FSM_112	FFPE/STANDARD	0.400267	19.8453	21.1452	85.7683	125.858	4.32184	5.95209	17.3199	16.6649
Craig_FSM_113	FFPE/STANDARD	0.329299	16.2471	19.1817	78.2855	152.434	4.81842	7.94685	15.4389	14.9114
Craig_FSM_114	FFPE/STANDARD	0.343594	19.6355	24.6923	74.7296	148.464	3.80585	6.01256	18.2791	17.3289
Craig_FSM_115	FFPE/STANDARD	0.324819	20.0873	28.7086	76.5018	203.102	3.80846	7.0746	16.8475	15.2509
Craig_FSM_116	FFPE/STANDARD	0.311918	41.2044	32.0477	441.254	214.593	10.7089	6.69605	17.2336	17.5194
Craig_FSM_117	FFPE/STANDARD	0.345781	16.6691	21.1229	63.1185	187.622	3.78655	8.88238	16.11	12.5072
Craig_FSM_118	FFPE/STANDARD	0.459878	21.7357	28.106	89.9526	210.435	4.13848	7.48718	17.3891	15.8986
Craig_FSM_119	FFPE/STANDARD	0.337344	48.0565	10.8318	195.127	28.9651	4.06037	2.67407	13.9277	21.7396
Craig_FSM_120	FFPE/STANDARD	0.259993	18.8333	33.4937	77.7333	198.535	4.12744	5.92753	19.6902	21.3147
Craig_FSM_121	FFPE/STANDARD	0.470056	12.5817	11.3442	45.7297	46.567	3.63461	4.10492	21.4527	24.241
Craig_FSM_122	FFPE/STANDARD	0.574385	59.58	6.63179	419.857	18.4424	7.04694	2.78091	14.5904	23.7164
Craig_FSM_123	CELLS/FSM	0.201697	31.3085	29.7343	122.14	168.242	3.90118	5.65817	17.6111	19.1165
Craig_FSM_124	CELLS/FSM	0.184781	39.3699	40.0602	138.523	208.212	3.5185	5.19748	16.0626	16.4663
Craig_FSM_125	CELLS/FSM	0.175797	42.8975	46.6927	176.887	285.936	4.12348	6.12378	14.6469	12.857
Craig_FSM_126	CELLS/FSM	0.156303	40.0299	39.8426	173.965	250.324	4.34588	6.28282	15.5655	15.4739
Craig_FSM_127	CELLS/FSM	0.183769	42.0343	46.2198	129.264	214.52	3.0752	4.6413	15.2049	14.9013
Craig_FSM_128	CELLS/FSM	0.22135	36.8255	26.2682	125.091	122.18	3.39686	4.65125	15.0297	15.1813
Craig_FSM_129	CELLS/FSM	0.153965	44.5122	42.7149	184.166	249.884	4.13743	5.85004	14.4739	13.4845
Craig_FSM_130	CELLS/FSM	0.214331	48.886	28.2403	352.252	153.436	7.20558	5.43323	15.9092	14.4821
Craig_FSM_131	CELLS/FSM	0.217656	35.7573	27.1641	127.487	123.91	3.56534	4.56154	14.8222	14.5733
Craig_FSM_132	CELLS/FSM	0.188784	31.1804	27.1428	91.4558	127.639	2.93312	4.7025	16.2844	16.1508
Craig_FSM_133	CELLS/FSM	0.179019	42.1353	45.6512	131.939	219.344	3.13132	4.80478	15.9535	14.482
Craig_FSM_134	CELLS/FSM	0.182569	29.6668	25.1175	127.778	136.13	4.3071	5.41972	14.0081	14.7721
Craig_FSM_135	CELLS/FSM	0.178151	53.1629	50.55	160.248	229.816	3.01428	4.54631	14.8271	15.65
Craig_FSM_136	CELLS/FSM	0.283979	30.9087	28.2563	136.539	122.288	4.41749	4.32781	15.2336	14.8382
Craig_FSM_137	CELLS/FSM	0.181634	52.8025	27.7565	176.185	109.869	3.33668	3.95832	15.8825	21.8475
Craig_FSM_138	CELLS/FSM	0.199159	38.6095	27.5753	120.954	116.548	3.13275	4.22654	14.4901	15.6797
Craig_FSM_139	CELLS/FSM	0.221985	57.9482	39.1414	180.248	194.821	3.1105	4.97737	14.5053	14.2319
Craig_FSM_140	CELLS/FSM	0.238445	16.6939	17.9058	127.592	110.917	7.64302	6.19446	18.335	18.5208
Craig_FSM_141	CELLS/FSM	0.153176	31.6925	43.9046	255.275	259.799	8.05474	5.91735	14.911	15.196
Craig_FSM_142	CELLS/FSM	0.231693	16.42	21.651	115.791	121.359	7.05181	5.60523	16.2036	13.7529
Craig_FSM_143	CELLS/FSM	0.219152	17.8374	21.2975	144.165	172.523	8.08217	8.10063	14.3573	14.6563
Craig_FSM_144	CELLS/FSM	0.217486	27.3073	20.0561	80.2583	95.0571	2.93908	4.73956	22.804	22.3051
Craig_FSM_145	CELLS/FSM	0.179595	36.312	44.7375	144.93	266.089	3.99124	5.94779	15.8064	16.4494
Craig_FSM_146	CELLS/FSM	0.165407	32.4077	40.6907	136.339	228.721	4.20699	5.62096	16.2812	16.1585
Craig_FSM_147	CELLS/FSM	0.175359	28.4193	27.7021	137.763	150.951	4.84751	5.44908	15.9031	16.2825
Craig_FSM_148	CELLS/FSM	0.17039	33.5371	38.5593	139.788	235.218	4.16816	6.10016	14.9741	14.496
Craig_FSM_149	CELLS/FSM	0.151555	31.8218	36.3887	154.846	248.689	4.86603	6.83424	15.2757	16.4861
Craig_FSM_150	CELLS/FSM	0.149949	33.3361	38.4643	140.802	216.666	4.22371	5.63291	18.2685	18.4231
Craig_FSM_151	CELLS/FSM	0.221124	43.4419	43.5433	179.247	312.19	4.12613	7.16965	13.6977	13.0012
Craig_FSM_152	CELLS/FSM	0.181992	43.304	41.0074	183.077	294.2	4.22772	7.17431	12.8991	12.4429
Craig_FSM_153	FROZEN/FSM	0.15187	59.6398	37.9456	478.666	216.577	8.02595	5.70757	15.8009	18.7515
Craig_FSM_154	FROZEN/FSM	0.149219	66.7579	40.0044	473.781	221.757	7.097	5.54332	17.5178	19.765
Craig_FSM_155	FROZEN/FSM	0.13328	87.3016	57.1928	485.236	292.602	5.55816	5.11606	15.3584	17.9112
Craig_FSM_156	FROZEN/FSM	0.132555	72.727	50.873	440.445	263.403	6.05614	5.17766	16.1409	17.7543
Craig_FSM_157	FROZEN/FSM	0.124904	68.217	50.7269	411.761	285.329	6.03605	5.62481	15.1108	17.6909
Craig_FSM_158	FROZEN/FSM	0.138695	68.4027	43.0646	395.433	209.963	5.78096	4.87554	16.5677	18.4231
Craig_FSM_159	FROZEN/FSM	0.137342	69.5383	42.6573	353.329	220.84	5.08107	5.17707	15.4507	16.4937
Craig_FSM_160	FROZEN/FSM	0.139645	62.1942	44.8828	430.027	250.883	6.91426	5.58974	17.5641	21.006
Craig_FSM_161	CELLS/FSM	0.146964	51.6118	43.4387	254.249	200.399	4.92618	4.61337	10.927	13.3824
Craig_FSM_162	CELLS/FSM	0.170564	57.5685	40.5474	297.113	209.84	5.16103	5.17518	16.7133	16.9683
Craig_FSM_163	CELLS/FSM	0.145399	56.8489	47.0814	311.815	236.941	5.48498	5.03258	15.2935	15.9278
Craig_FSM_164	CELLS/FSM	0.206744	40.0664	24.2506	150.195	95.3412	3.74865	3.9315	13.5908	16.0697
Craig_FSM_165	CELLS/FSM	0.154424	57.1359	39.8558	258.369	175.517	4.52201	4.4038	14.906	16.4637
Craig_FSM_166	CELLS/FSM	0.158175	54.7396	34.841	252.47	159.007	4.6122	4.56379	12.0926	12.58
Craig_FSM_167	CELLS/FSM	0.253086	23.5493	16.081	75.6325	56.7478	3.21166	3.52887	13.0807	16.2597
Craig_FSM_168	CELLS/FSM	0.170609	50.4523	47.2309	289.291	312.768	5.73395	6.6221	14.1526	14.0788
Craig_FSM_169	CELLS/FSM	0.154807	49.0954	41.6885	226.719	230.642	4.61793	5.53251	13.9778	15.5064
Craig_FSM_170	CELLS/FSM	0.162346	38.8581	36.0687	230.829	206.724	5.94031	5.73139	12.3129	14.6819
Craig_FSM_171	CELLS/FSM	0.165482	43.2626	34.7754	221.075	219.952	5.11007	6.32493	11.45	13.143
Craig_FSM_172	CELLS/STANDARD	0.189954	46.1829	30.8096	212.893	192.954	4.60978	6.26278	13.2764	13.04
Craig_FSM_173	CELLS/STANDARD	0.205179	51.0404	68.1177	320.954	853.617	6.28824	12.5315	14.8764	16.6682
Craig_FSM_174	CELLS/STANDARD	0.214331	48.886	28.2403	352.252	153.436	7.20558	5.43323	15.9092	14.4821
Craig_FSM_175	CELLS/STANDARD	0.216977	45.4277	53.3795	284.117	349.148	6.25427	6.54086	15.9286	15.7651
Craig_FSM_176	CELLS/STANDARD	0.241607	36.256	23.2498	169.648	154.35	4.67917	6.63877	11.7311	11.1067
Craig_FSM_177	CELLS/STANDARD	0.241927	41.7707	42.9668	330.38	417.349	7.90937	9.71329	12.832	12.4787
Craig_FSM_178	CELLS/STANDARD	0.244798	48.8205	37.1748	282.219	173.36	5.78075	4.66337	14.055	13.7191
Craig_FSM_179	CELLS/STANDARD	0.247656	24.077	45.3795	85.3435	290.962	3.5446	6.41175	16.1541	13.977
Craig_FSM_180	CELLS/STANDARD	0.251607	29.5263	38.7221	238.286	337.868	8.07029	8.72546	19.1991	18.224
Craig_FSM_181	CELLS/STANDARD	0.257512	39.6432	39.2875	300.205	310.633	7.57268	7.90666	14.4839	15.2216
Craig_FSM_182	CELLS/STANDARD	0.275409	34.7891	33.4698	261.424	293.513	7.51453	8.7695	14.5441	12.417
Craig_FSM_183	CELLS/STANDARD	0.276058	27.2539	29.6893	162.96	212.264	5.97932	7.14951	26.4709	24.3206
Craig_FSM_184	CELLS/STANDARD	0.285754	41.2509	46.64	284.984	344.729	6.90855	7.39128	13.3097	13.2156
Craig_FSM_185	CELLS/STANDARD	0.291109	30.214	17.7659	154.502	86.9556	5.11359	4.89453	15.0569	17.1143
Craig_FSM_186	CELLS/STANDARD	0.309784	32.744	33.668	121.076	195.122	3.69765	5.79548	25.7471	21.5585
Craig_FSM_187	CELLS/STANDARD	0.310682	9.82581	24.8586	77.574	132.366	7.89492	5.32475	17.9666	16.5622
Craig_FSM_188	CELLS/STANDARD	0.318385	35.631	28.2705	121.198	167.174	3.40148	5.91337	16.9531	18.8027
Craig_FSM_189	CELLS/STANDARD	0.322159	25.2587	23.1904	116.53	182.077	4.61346	7.85138	20.0037	21.31
Craig_FSM_190	CELLS/STANDARD	0.32485	43.1373	26.1338	215.528	127.045	4.99633	4.86132	26.3875	16.927
Craig_FSM_191	CELLS/STANDARD	0.328789	8.47939	33.1977	79.1816	198.348	9.33812	5.97476	17.2506	14.8279
Craig_FSM_192	CELLS/STANDARD	0.339563	38.8654	33.9194	245.734	189.517	6.3227	5.58727	31.6458	20.2317
Craig_FSM_193	CELLS/STANDARD	0.349096	30.8377	33.3049	155.657	192.728	5.04762	5.78677	20.8519	13.0419
Craig_FSM_194	CELLS/STANDARD	0.388409	38.835	18.3586	174.74	113.853	4.49955	6.20162	84.6417	72.6277
Craig_FSM_195	CELLS/STANDARD	0.396504	24.6417	15.2007	86.8412	102.695	3.52416	6.75595	16.6495	16.9469
Craig_FSM_196	CELLS/STANDARD	0.427765	27.2451	19.3345	119.182	118.196	4.37444	6.11322	33.9191	33.6035
Craig_FSM_197	CELLS/STANDARD	0.577782	21.3891	5.27959	58.7936	18.5177	2.74876	3.50741	18.4461	21.115
Craig_FSM_198	CELLS/STANDARD	0.625137	3.24228	11.5302	22.8134	56.9508	7.03621	4.93927	20.1577	23.6547
Craig_FSM_199	CELLS/STANDARD	0.682981	20.9885	1.40735	58.4703	6.54576	2.78582	4.65113	18.1001	na
Craig_FSM_200	CELLS/STANDARD	0.809129	24.0743	1.78374	80.2179	7.31899	3.3321	4.10316	14.978	na
